# Supplementary material for: A High-Quality Genome Assembly of Striped Catfish (Pangasianodon hypophthalmus) Based on Highly Accurate Long-Read HiFi Sequencing Data
Source: MDPI journal article supplement (doi:10.3390/genes13050923), 2022-05-22
Supplement: s1 [file s1]

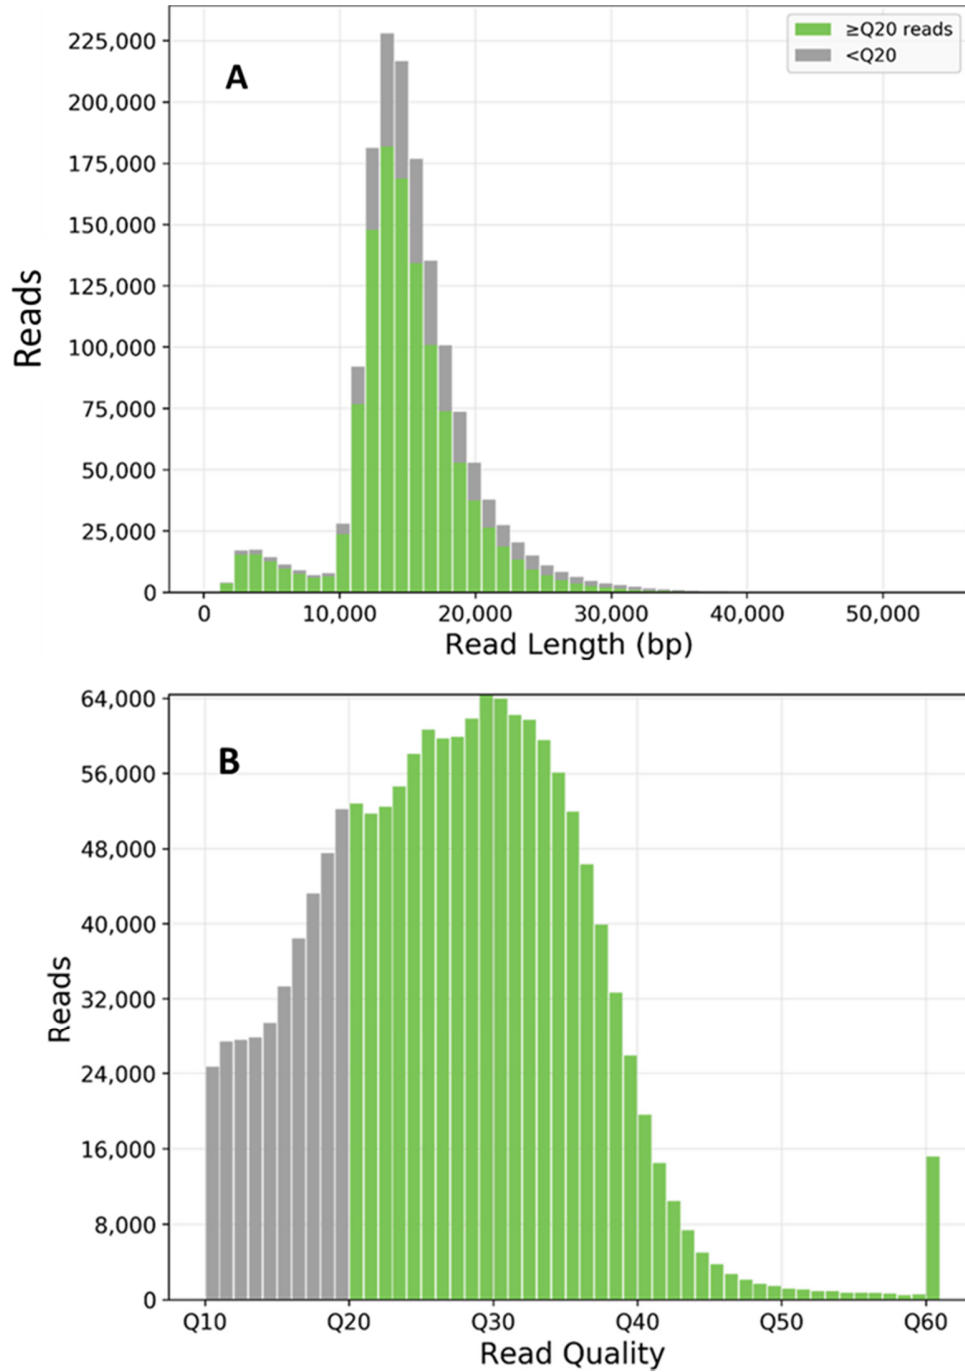

Figure S1: Distribution of read length (A) and read quality (B). Used HiFi sequences ( $Q \geq 20$ ) are shown in green.

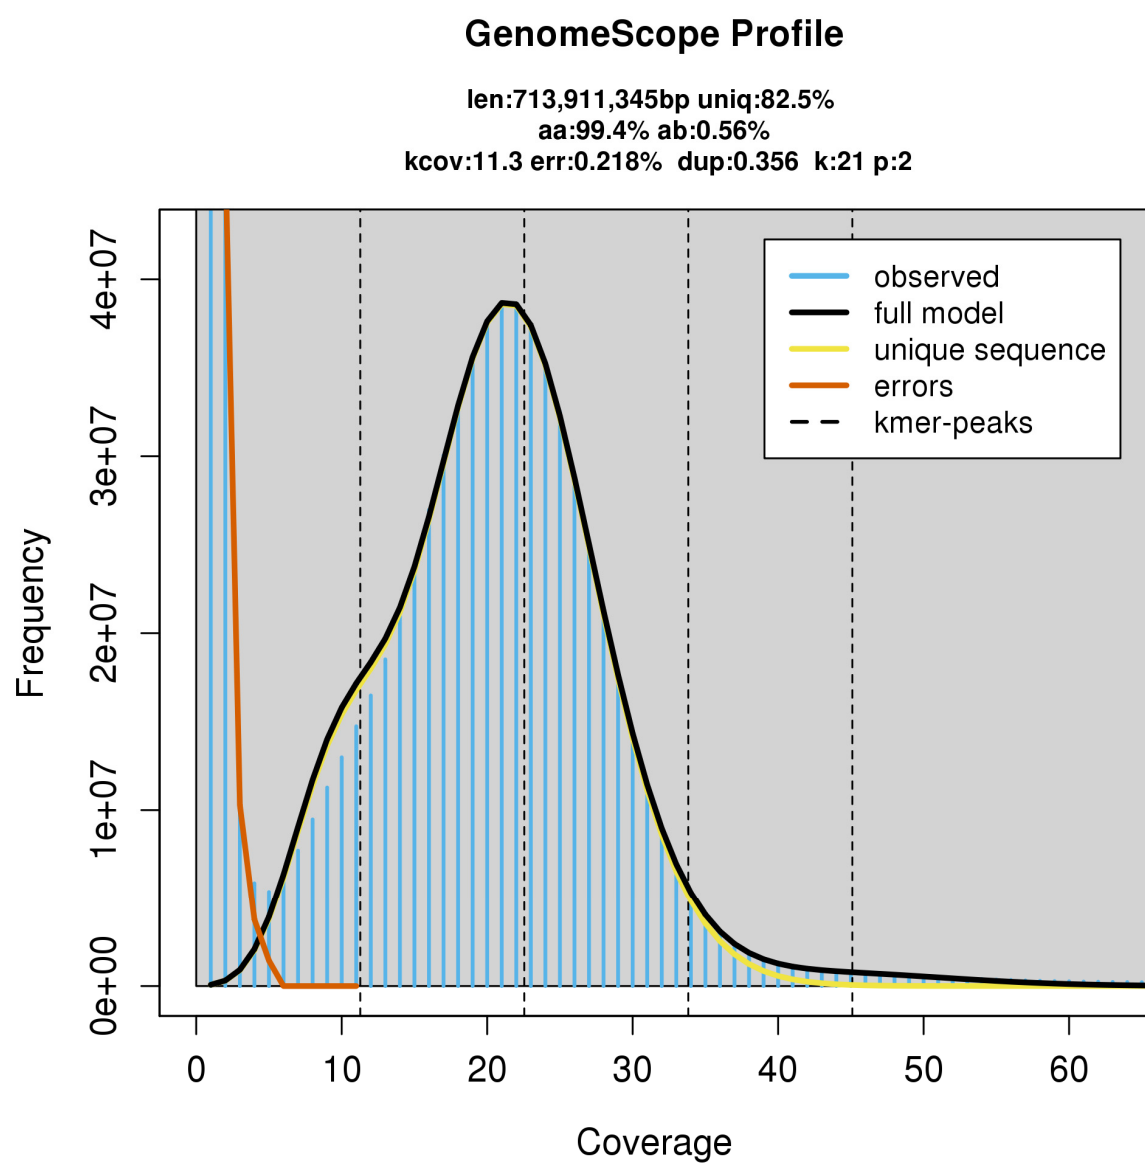

Figure S2: A *k*-mer analysis of the genome sequencing reads for the striped catfish using GenomeScope

Table S1 Repetitive elements in the striped catfish genome

| TE Class                             | Family                             | Sub-family             | De novo |             |            | Homology |             |            |
|--------------------------------------|------------------------------------|------------------------|---------|-------------|------------|----------|-------------|------------|
|                                      |                                    |                        | Count   | Length (bp) | Percentage | Count    | Length (bp) | Percentage |
| Class I<br>(Retroelements)           | Non-LTR<br>elements                | SINEs:                 | 20,832  | 31,13,943   | 0.39       | 50584    | 6755978     | 0.86       |
|                                      |                                    | Penelope               | 1,757   | 615,424     | 0.08       | 6402     | 1467082     | 0.19       |
|                                      |                                    | LINEs:                 | 98,550  | 30,509,760  | 3.87       | 121,145  | 29,469,338  | 3.74       |
|                                      |                                    | CRE/SLACS              | 0       | 0           | 0.00       | 0        | 0           | 0.00       |
|                                      |                                    | L2/CR1/Rex             | 76,961  | 24,726,066  | 3.14       | 77,327   | 20,030,762  | 2.54       |
|                                      |                                    | R1/LOA/Jockey          | 1,567   | 82,3571     | 0.10       | 1,918    | 412,240     | 0.05       |
|                                      |                                    | R2/R4/NeSL             | 1,219   | 376,738     | 0.05       | 649      | 270,429     | 0.03       |
|                                      |                                    | RTE/Bov-B              | 8,119   | 1,813,291   | 0.23       | 19,762   | 3,853,265   | 0.49       |
|                                      | LTR<br>elements                    | L1/CIN4                | 3,687   | 935,167     | 0.12       | 3,221    | 1,146,312   | 0.15       |
|                                      |                                    | BEL/Pao                | 2,006   | 781,888     | 0.10       | 1,030    | 399,154     | 0.05       |
|                                      |                                    | Ty1/Copia              | 0       | 0           | 0.0        | 1,642    | 513,400     | 0.07       |
|                                      |                                    | Gypsy/DIRS1            | 42,978  | 14,309,769  | 1.82       | 45,254   | 15,858,477  | 2.01       |
|                                      |                                    | Retroviral             | 2,639   | 924,326     | 0.12       | 6,469    | 1,185,074   | 0.15       |
|                                      |                                    | Total LTR<br>elements: | 87,491  | 23,554,747  | 2.99       | 79,867   | 21,805,013  | 2.77       |
| Total Retroelements (a):             |                                    |                        | 206,873 | 57,178,450  | 7.25       | 251,596  | 58,030,329  | 7.36       |
| Class II<br>(DNA transposons)        | hobo-Activator                     |                        | 99,579  | 17,622,531  | 2.24       | 122,119  | 19,242,281  | 2.44       |
|                                      | Tc1-IS630-Pogo                     |                        | 193,506 | 53,485,756  | 6.78       | 230,862  | 59,455,614  | 7.54       |
|                                      | En-Spm                             |                        | 0       | 0           | 0.00       | 0        | 0           | 0.00       |
|                                      | MuDR-IS905                         |                        | 0       | 0           | 0.00       | 0        | 0           | 0.00       |
|                                      | PiggyBac                           |                        | 2,069   | 67,2161     | 0.09       | 4,871    | 838,840     | 0.11       |
|                                      | Tourist/Harbinger                  |                        | 20,401  | 4,866,723   | 0.62       | 29,947   | 5,121,870   | 0.65       |
|                                      | Other (Mirage, P-element, Transib) |                        | 1,608   | 321,938     | 0.04       | 1,660    | 460,487     | 0.06       |
| Total DNA transposons (b):           |                                    |                        | 442,919 | 101,790,693 | 12.91      | 576,633  | 115,072,113 | 14.60      |
| Rolling-circles (c)                  |                                    |                        | 11,569  | 2,998,325   | 0.38       | 18437    | 3986467     | 0.51       |
| Unclassified (d):                    |                                    |                        | 694,670 | 112,360,030 | 14.25      | 680699   | 125,718,307 | 15.95      |
| Total interspersed repeats (a+b+c+d) |                                    |                        |         | 271,329,173 | 34.42      |          | 298,820,749 | 37.90      |
| Small RNA:                           |                                    |                        | 3,756   | 2,166,067   | 0.27       | 5,071    | 1,558,812   | 0.20       |
| Satellites:                          |                                    |                        | 1,817   | 497,961     | 0.06       | 11,591   | 2,308,540   | 0.29       |
| Simple repeats:                      |                                    |                        | 573,469 | 28,230,949  | 3.58       | 520,916  | 22,917,129  | 2.91       |
| Low complexity:                      |                                    |                        | 45,375  | 3,133,402   | 0.40       | 40,587   | 2,517,469   | 0.32       |
| Total bases masked:                  |                                    |                        |         | 308,355,877 | 39.11      |          | 331,921,288 | 42.10      |

Table S2 Overview of simple sequence repeats (SSRs)

| SSR Type                      | Set of repeating bases | Repetition for the set | Cutoffs and Range |                                | Total Length       |
|-------------------------------|------------------------|------------------------|-------------------|--------------------------------|--------------------|
|                               |                        |                        | number            | Example                        |                    |
| Mono nucleotide Repeats (p1)  | 1                      | >= 10 bases            |                   | AAAAAAAAAAAAA                  | >=10 to Any length |
| Di nucleotide Repeats (p2)    | 2                      | >= 6 Pairs             |                   | CACACACACACA                   | >=12 to Any length |
| Tri nucleotide Repeats (p3)   | 3                      | >= 5 Sets              |                   | AACAACAACAACAAC                | >=15 to Any length |
| Tetra nucleotide Repeats (p4) | 4                      | >= 5 Sets              |                   | AAACAAACAAACAAAC               | >=20 to Any length |
| Penta nucleotide Repeats (p5) | 5                      | >= 5 Sets              |                   | AAATGAAATGAAATGAAATG           | >=25 to Any length |
| Hexa nucleotide Repeats (p6)  | 6                      | >= 5 Sets              |                   | AAATATAAATATAAATATAAATATAAATAT | >=30 to Any length |

| Cutoffs and Range                              |  | Count       |
|------------------------------------------------|--|-------------|
| Statistics                                     |  |             |
| Total number of sequences examined             |  | 381         |
| Total size of examined sequences (bp)          |  | 788,355,903 |
| Total number of identified SSRs                |  | 960,574     |
| Number of SSR containing sequences             |  | 377         |
| Number of sequences containing more than 1 SSR |  | 376         |
| Number of SSRs present in compound formation   |  | 320,010     |
| p1                                             |  | 315,319     |
| p2                                             |  | 510,826     |
| p3                                             |  | 73,996      |
| p4                                             |  | 53,670      |
| p5                                             |  | 4,726       |
| p6                                             |  | 2,037       |
